# Supplementary material for: Differentiating head and neck carcinoma from lung carcinoma with an electronic nose: a proof of concept study
Source: Springer Nature journal article supplement (doi:10.1007/s00405-016-4038-x), 2016-04-16
Supplement: MOESM1 [file 10019236]

Supplementary data 1

| Patient number | Device number | Origin | Time of measurement | Age | Gender | Current smoking | Food intake <4 hours | Site                 | TNM-stage | Lung stage | Histopathology |
|----------------|---------------|--------|---------------------|-----|--------|-----------------|----------------------|----------------------|-----------|------------|----------------|
| 1              | 379           | Lung   | 15:36               | 60  | Male   | No              | Yes                  | Left upper quadrant  | pT2aN0M0  | IIb        | SCC            |
| 2              | 379           | Lung   | 11:00               | 55  | Female | Yes             | Yes                  | Left lower quadrant  | cT3N2M0   | IIIa       | Adenocarcinoma |
| 3              | 379           | HNC    | 08:31               | 83  | Male   | No              | Yes                  | Glottic larynx       | cT2N0M0   |            | SCC            |
| 4              | 379           | HNC    | 13:55               | 63  | Male   | Yes             | Yes                  | Oropharynx           | cT2N1M0   |            | SCC            |
| 5              | 379           | HNC    | 09:40               | 78  | Male   | No              | No                   | Oral cavity          | pT1N0M0   |            | SCC            |
| 6              | 379           | HNC    | 10:09               | 83  | Female | No              | Yes                  | Oral cavity          | cT1N0M0   |            | SCC            |
| 7              | 379           | HNC    | 09:05               | 66  | Female | Yes             | Yes                  | Oropharynx           | pT2N2aM0  |            | SCC            |
| 8              | 379           | Lung   | 15:38               | 58  | Female | Yes             | Yes                  | Left Hilar           | cT4N2M1a  | IV         | SCLC           |
| 9              | 379           | Lung   | 17:37               | 73  | Male   | No              | Yes                  |                      | cT3NxMx   |            | Mesothelioma   |
| 10             | 379           | HNC    | 11:33               | 60  | Male   | Yes             | No                   | Oropharynx           | cT2N2bM0  |            | SCC            |
| 11             | 379           | HNC    | 11:19               | 71  | Female | No              | Yes                  | Oral cavity          | pT1N0M0   |            | SCC            |
| 12             | 379           | HNC    | 09:46               | 65  | Male   | Yes             | Yes                  | Oral cavity          | pT1N0Mx   |            | SCC            |
| 13             | 379           | Lung   | 10:32               | 81  | Male   | No              | Yes                  | Right upper quadrant | cT4N3M1b  | IV         | SCLC           |
| 14             | 379           | Lung   | 14:14               | 56  | Female | Yes             | Yes                  | Right lower quadrant | cT2aN3M1b | IV         | Adenocarcinoma |
| 15             | 379           | HNC    | 13:25               | 85  | Male   | No              | No                   | Glottic larynx       | cTisN0M0  |            | SCC            |
| 16             | 379           | HNC    | 08:18               | 56  | Male   | No              | No                   | Glottic larynx       | cT1bN0M0  |            | SCC            |
| 17             | 379           | Lung   | 15:39               | 71  | Male   | No              | Yes                  |                      | cT3N1M0   | III        | Mesothelioma   |
| 18             | 379           | Lung   | 15:46               | 54  | Male   | No              | Yes                  | Left upper quadrant  | cT4N2M1b  | IV         | Adenocarcinoma |
| 19             | 362           | HNC    | 14:45               | 68  | Male   | No              | No                   | Glottic larynx       | pT1aN0M0  |            | SCC            |
| 20             | 362           | HNC    | 09:16               | 81  | Male   | Yes             | Yes                  | Supra glottic larynx | cT2N2cM0  |            | SCC            |
| 21             | 362           | HNC    | 09:54               | 60  | Male   | Yes             | Yes                  | Oral cavity          | pT2N0M0   |            | SCC            |
| 22             | 362           | HNC    | 10:21               | 92  | Female | No              | Yes                  | Oral cavity          | cT2N2bM0  |            | SCC            |
| 23             | 362           | HNC    | 09:12               | 60  | Male   | Yes             | Yes                  | Oral cavity          | pT2N0M0   |            | SCC            |
| 24             | 362           | HNC    | 10:22               | 63  | Male   | Yes             | Yes                  | Oropharynx           | cT1N0M0   |            | SCC            |
| 25             | 362           | HNC    | 11:02               | 63  | Male   | Yes             | No                   | Oropharynx           | cT3N2bM0  |            | SCC            |
| 26             | 362           | HNC    | 10:13               | 62  | Male   | Yes             | Yes                  | Oral cavity          | pT3N2cM0  |            | SCC            |
| 27             | 362           | Lung   | 14:39               | 68  | Male   | Yes             | Yes                  | Right upper quadrant | cT4N1M1a  | IV         | Adenocarcinoma |
| 28             | 362           | Lung   | 16:12               | 60  | Male   | Yes             | Yes                  | Right upper quadrant | cT4N2M1b  | IV         | Adenocarcinoma |
| 29             | 362           | Lung   | 14:06               | 66  | Female | Yes             | Yes                  | Left upper quadrant  | cT3N0M0   | IIb        | SCC            |

Abbreviations; HNC: head and neck carcinoma, Unkn: unknown, SCC: squamous cell carcinoma, SCLC: small cell lung carcinoma

Supplementary data 1 (continued)

| Patient number | Device number | Origin | Time of measurement | Age | Gender | Current smoking | Food intake <4 hours | Site                 | TNM-stage | Lung stage | Histopathology        |
|----------------|---------------|--------|---------------------|-----|--------|-----------------|----------------------|----------------------|-----------|------------|-----------------------|
| 30             | 362           | HNC    | 11:21               | 67  | Male   | No              | Yes                  | Glottic larynx       | cT2N0M0   |            | SCC                   |
| 31             | 362           | Lung   | 13:46               | 66  | Female | No              | Yes                  | Right upper quadrant | cT4N2M1b  | IV         | SCLC                  |
| 32             | 362           | HNC    | 10:22               | 56  | Male   | No              | Yes                  | Glottic larynx       | cT1bN0M0  |            | SCC                   |
| 33             | 362           | Lung   | 14:05               | 80  | Male   | No              | Yes                  | Left upper quadrant  | cT1N2bM0  | IIIa       | SCC                   |
| 34             | 362           | Lung   | 14:38               | 56  | Male   | Yes             | Yes                  | Left lower quadrant  | cT3N2M1b  | IV         | Adenocarcinoma        |
| 35             | 362           | HNC    | 10:06               | 74  | Male   | No              | Yes                  | Hypopharynx          | pT2N2bM0  |            | SCC                   |
| 36             | 362           | Lung   | 15:44               | 71  | Male   | No              | Yes                  |                      | cT3N1M0   | III        | Mesothelioma          |
| 37             | 362           | Lung   | 16:02               | 54  | Female | Yes             | Yes                  | Right midquadrant    | cT4N3M1b  | IV         | Adenocarcinoma        |
| 38             | 362           | Lung   | 16:36               | 58  | Male   | Yes             | Yes                  | Left upper quadrant  | cT1bN0M0  | Ia         | Unknown               |
| 39             | 315           | HNC    | 9:06                | 75  | Male   | No              | No                   | Glottic larynx       | cT3N0M0   |            | SCC                   |
| 40             | 315           | HNC    | 12:53               | 57  | Male   | No              | Yes                  | Oropharynx           | cT3N0M0   |            | SCC                   |
| 41             | 315           | HNC    | 10:53               | 62  | Male   | No              | Unkn                 | Glottic larynx       | cT1bN0M0  |            | SCC                   |
| 42             | 315           | HNC    | 14:04               | 47  | Male   | Yes             | No                   | Oral cavity          | cT1N0M0   |            | SCC                   |
| 43             | 315           | HNC    | 10:39               | 77  | Male   | Yes             | Unkn                 | Glottic larynx       | cT1aN0Mx  |            | SCC                   |
| 44             | 315           | HNC    | 10:05               | 62  | Female | No              | Unkn                 | Hypopharynx          | pT4aN3M0  |            | SCC                   |
| 45             | 315           | HNC    | 11:14               | 66  | Male   | Yes             | Yes                  | Oropharynx           | pT1N2bM0  |            | SCC                   |
| 46             | 315           | HNC    | 08:51               | 68  | Male   | Yes             | Yes                  | Glottic larynx       | pT4N1M0   |            | SCC                   |
| 47             | 315           | HNC    | 09:45               | 51  | Male   | Yes             | Yes                  | Glottic larynx       | pT2N0M0   |            | SCC                   |
| 48             | 315           | HNC    | 08:23               | 67  | Female | No              | Yes                  | Oral cavity          | pT1N0M0   |            | SCC                   |
| 49             | 315           | HNC    | 08:50               | 60  | Female | Yes             | Yes                  | Supra glottic larynx | cT3N1M0   |            | SCC                   |
| 50             | 315           | Lung   | 14:23               | 61  | Male   | No              | Yes                  | Right upper quadrant | pT1aN0M0  | Ia         | Neuroendocrine tumour |
| 51             | 315           | Lung   | 13:25               | 57  | Male   | Yes             | Yes                  |                      | cTxN2M1a  | IV         | Adenocarcinoma        |
| 52             | 315           | Lung   | 11:04               | 80  | Male   | No              | Yes                  | Left upper quadrant  | cT1N2bM0  | IIIa       | SCC                   |
| 53             | 315           | Lung   | 12:23               | 56  | Male   | Yes             | Yes                  | Left lower quadrant  | cT3N2M1b  | IV         | Adenocarcinoma        |
| 54             | 309           | HNC    | 10:10               | 51  | Male   | Yes             | Unkn                 | Oropharynx           | cT2N2bM0  |            | SCC                   |
| 55             | 309           | HNC    | 09:01               | 57  | Male   | Yes             | Unkn                 | Glottic larynx       | cT2N2cM0  |            | SCC                   |
| 56             | 309           | HNC    | 10:28               | 58  | Male   | Yes             | Unkn                 | Oral cavity          | pT2N0M0   |            | SCC                   |
| 57             | 309           | HNC    | 09:45               | 73  | Male   | Yes             | Unkn                 | Glottic larynx       | cT2N0M0   |            | SCC                   |

Abbreviations; HNC: head and neck carcinoma, Unkn: unknown, SCC: squamous cell carcinoma, SCLC: small cell lung carcinoma

Supplementary data 1 (continued)

| Patient number | Device number | Origin | Time of measurement | Age | Gender | Current smoking | Food intake <4 hours | Site                 | TNM-stage | Lung stage | Histopathology        |
|----------------|---------------|--------|---------------------|-----|--------|-----------------|----------------------|----------------------|-----------|------------|-----------------------|
| 58             | 309           | HNC    | 09:33               | 57  | Male   | Yes             | Unkn                 | Oral cavity          | pT1N0M0   |            | SCC                   |
| 59             | 309           | HNC    | 11:22               | 63  | Male   | No              | Unkn                 | Oropharynx           | cT2N0M0   |            | SCC                   |
| 60             | 309           | HNC    | 09:10               | 78  | Male   | Yes             | Unkn                 | Supra glottic larynx | cT2N1Mx   |            | SCC                   |
| 61             | 309           | HNC    | 10:33               | 30  | Male   | Yes             | Unkn                 | Oropharynx           | pT2N2bM0  |            | SCC                   |
| 62             | 309           | HNC    | 13:03               | 69  | Male   | Yes             | Yes                  | Glottic larynx       | pT1bN0M0  |            | SCC                   |
| 63             | 309           | HNC    | 14:34               | 47  | Male   | No              | No                   | Oral cavity          | cT1N0M0   |            | SCC                   |
| 64             | 309           | HNC    | 09:59               | 54  | Male   | Yes             | Unkn                 | Hypopharynx          | cT3N2bM0  |            | SCC                   |
| 65             | 309           | HNC    | 08:13               | 30  | Male   | Yes             | No                   | Oropharynx           | pT2N2cM0  |            | SCC                   |
| 66             | 309           | HNC    | 09:00               | 69  | Male   | Yes             | Unkn                 | Glottic larynx       | pT1bN0M0  |            | SCC                   |
| 67             | 309           | HNC    | 10:11               | 57  | Female | No              | Yes                  | Supra glottic larynx | cT2N2bM0  |            | SCC                   |
| 68             | 309           | Lung   | 16:27               | 66  | Female | Yes             | Yes                  |                      | cTxN3M1b  | IIIb       | Adenocarcinoma        |
| 69             | 309           | Lung   | 10:59               | 73  | Male   | No              | Yes                  | Left upper quadrant  | cT4aN2M1b | IV         | Adenocarcinoma        |
| 70             | 259           | Lung   | 14:15               | 78  | Female | No              | Yes                  | Left lower quadrant  | cT3N2M1b  | IV         | Adenocarcinoma        |
| 71             | 259           | Lung   | 10:18               | 62  | Female | No              | No                   | Left lower quadrant  | pT1aN2M0  | IIIa       | Adenocarcinoma        |
| 72             | 259           | Lung   | 09:58               | 77  | Male   | No              | Yes                  | Right upper quadrant | cT4N2M1b  | IV         | SCC                   |
| 73             | 259           | Lung   | 09:38               | 67  | Male   | No              | No                   | Right upper quadrant | pT3N1M0   | IIIa       | Neuroendocrine tumour |
| 74             | 259           | Lung   | 15:48               | 69  | Female | No              | Yes                  | Right lower quadrant | cT4N2M0   | IIIb       | Adenocarcinoma        |
| 75             | 259           | Lung   | 11:45               | 80  | Male   | No              | Yes                  | Right lower quadrant | pT1bN0M0  | Ia         | Adenocarcinoma        |
| 76             | 259           | Lung   | 13:15               | 46  | Female | Yes             | Yes                  | Right upper quadrant | cT3N2M0   | IIIa       | Adenocarcinoma        |
| 77             | 259           | Lung   | 14:28               | 63  | Male   | No              | Yes                  | Left lower quadrant  | cT3N3N0   | IIIb       | Adenocarcinoma        |
| 78             | 259           | Lung   | 14:03               | 56  | Female | No              | Yes                  | Right upper quadrant | T2aN2M1b  | IV         | Adenocarcinoma        |
| 79             | 259           | HNC    | 10:18               | 72  | Male   | Yes             | Yes                  | Oropharynx           | cT2N0M0   |            | SCC                   |
| 80             | 259           | HNC    | 14:23               | 63  | Male   | Yes             | No                   | Oropharynx           | cT1N0M0   |            | SCC                   |
| 81             | 259           | HNC    | 14:29               | 62  | Male   | Yes             | Yes                  | Oral cavity          | pT3N2cM0  |            | SCC                   |
| 82             | 259           | HNC    | 10:20               | 34  | Male   | Yes             | Yes                  | Cavum nasi           | cT3N3bM1  |            | SCC                   |
| 83             | 259           | HNC    | 11:27               | 46  | Male   | Yes             | Yes                  | Oral cavity          | pT2N2bM0  |            | SCC                   |
| 84             | 259           | HNC    | 09:16               | 51  | Female | No              | Yes                  | Cavum nasi           | cT2N0M0   |            | SCC                   |

Abbreviations; HNC: head and neck carcinoma, Unkn: unknown, SCC: squamous cell carcinoma, SCLC: small cell lung carcinoma
